# Supplementary material for: Sheath-tailed bats (Chiroptera: Emballonuridae) from the early Pleistocene Rackham’s Roost Site, Riversleigh World Heritage Area, and the distribution of northern Australian emballonurid species
Source: PeerJ. 2021 Feb 25;9:e10857. doi: 10.7717/peerj.10857 (PMC7916536; doi:10.7717/peerj.10857)
Supplement: Supplemental Information 4 [file peerj-09-10857-s004.xlsx]

## Sheet: Sheet1
						Cranial Measurements															Dentary measurements										Upper tooth row
TYPE	ID	Specimen Type	Location	West of Mt Isa?	SEX	GL	MW	PL	BL	OP	RC1 - LC1	C^1 - M^3 LEFT	C^1 - M^3 RIGHT	C^1 -M^3 AVG	LOW	ZW	BW	ROL	ANS	PNS	CH	DL LEFT	DL RIGHT	DL AVG	c1-m3 LEFT	c1-m3 RIGHT	c1-m3 AVG	RC LEFT	RC RIGHT	RC AVG	TOTAL LENGTH P4-M3	TOTAL LENGTH M1-M3	C1 LENGTH	P4 LENGTH	M1 LENGTH	M2 LENGTH	M3 LENGTH	Upper C1 width	Upper P4 width	M1 Buccal Length	M1 lingual length	M1 width	M1 Paracone-heel	M1 Metastyle-metacone	M1 Paracone-mesostyle	M1 Heel width	M2 Buccal Length	M2 lingual length	M2 width
MODERN	M3509	Taphozous georgianus	Dunrobin, QLD		M	22.7	12.38	9.52	18.8	10.32	4.76	10.63	10.79	10.71	4.6	14.76	11.9	9.05	9.52	6.98	7.5	18.57	18.57	18.57	11.9	11.9	11.9	5.71	5.87	5.79	6.96	5.6	2.42	1.7	2.56	2.32	1.04	1.24	1.7	2.54	2.44	2.28	2.1	1.73	1.1	1.07	2.34	2.24	2.3
MODERN	M6024	Taphozous georgianus	Morinish, QLD		M	22.6	12.38	9.05	19.7	10.95	4.76	10.63	10.79	10.71	5.08	15.08	12.06	8.57	9.52	6.67	8.27	19.05	19.52	19.285	12.22	12.22	12.22	6.19	6.35	6.27	7.04	5.64	2.54	1.76	2.54	2.34	1.04	1.34	1.7	2.54	2.46	2.42	2.14	1.7	0.98	1.26	2.34	2.26	2.6
MODERN	M8542	Taphozous georgianus	Louies Ck, Adels Grove, QLD	Yes	M	21.74	12.06	9.05	18.87	9.68	4.6	10	10.16	10.08	4.92	14.29	11.59	9.37	8.89	6.35	7.24	18.25	18.25	18.25	10.79	10.79	10.79	5.71	5.56	5.635	6.68	5.32	2.26	1.66	2.44	2.2	0.98	1.24	1.52	2.44	2.4	2.16	1.84	1.48	0.97	1.12	2.2	2.02	2.28
MODERN	M8543	Taphozous georgianus	Louies Ck, Adels Grove, QLD	Yes	M	21.61	12.06	9.37	19.43	9.84	4.76	10	9.84	9.92	4.6	14.13	11.59	8.89	9.37	6.35	7.06	18.73	19.05	18.89	11.59	11.27	11.43	6.19	6.19	6.19	6.64	5.36	2.2	1.76	2.38	2.24	1.02	1.2	1.56	2.38	2.3	2.12	2.1	1.68	1.08	1.03	2.24	2.12	2.3
MODERN	M8544	Taphozous georgianus	Louies Ck, Adels Grove, QLD	Yes	F	22.17	11.59	9.37	19.38	10	4.6	10.32	10.63	10.475	4.29	13.97	10.95	8.73	9.05	6.03	7.43	18.41	18.41	18.41	11.59	11.43	11.51	6.03	5.4	5.715	7.12	5.68	2.28	1.74	2.54	2.28	1.06	1.3	1.6	2.54	2.4	2.28	1.98	1.85	1.12	1.22	2.28	2.16	2.38
MODERN	M8545	Taphozous georgianus	Louies Ck, Adels Grove, QLD	Yes	F	21.64	11.9	9.37	18.37	9.37	3.02	10.32	10.16	10.24	3.33	14.76	11.59	8.73	9.52	6.83	7.33	18.73	18.25	18.49	11.27	11.59	11.43	5.56	6.03	5.795	6.64	5.28	2.34	1.76	2.48	2.22	0.9	1.26	1.52	2.48	2.42	2.1	2.14	1.73	1.01	1.05	2.22	2.1	2.2
MODERN	M8546	Taphozous georgianus	Louies Ck, Adels Grove, QLD	Yes	F	22.05	12.06	9.52	18.84	9.68	4.44	9.84	9.68	9.76	3.97	13.97	11.11	9.52	9.05	6.35	7.29	18.25	17.78	18.015	11.43	11.27	11.35	6.19	5.71	5.95	6.84	5.44	2.2	1.68	2.44	2.28	0.96	1.4	1.58	2.44	2.4	1.94	2.06	1.62	1.05	0.95	2.28	2.14	2.12
MODERN	M8547	Taphozous georgianus	Louies Ck, Adels Grove, QLD	Yes	F	21.22	11.59	9.37	18.81	9.21	4.44	10.32	10.32	10.32	4.13	13.65	10.95	8.57	8.73	6.35	7.49	17.14	17.46	17.3	11.11	11.43	11.27	5.4	5.56	5.48	6.72	5.44	2.28	1.62	2.42	2.2	1.08	1.24	1.62	2.42	2.34	2.16	1.92	1.63	1	1.05	2.2	2.06	2.34
MODERN	M8548	Taphozous georgianus	Louies Ck, Adels Grove, QLD	Yes	M	21.38	11.43	9.52	18.22	?	4.44	10.48	10.48	10.48	4.92	13.97	10.79	8.73	9.05	6.83	7.41	17.94	17.94	17.94	11.9	11.9	11.9	5.87	5.71	5.79	6.92	5.72	2.36	1.8	2.56	2.38	1.1	1.26	1.54	2.56	2.54	2.3	2.18	1.73	1.08	1.14	2.38	2.22	2.22
MODERN	M8549	Taphozous georgianus	Louies Ck, Adels Grove, QLD	Yes	F	21.19	?	9.21	18.87	?	?	?	?	?	4.29	?	11.11	9.21	?	6.51	7.16	?	18.25	18.25	?	?	?	?	5.71	5.71	6.88	5.44	?	1.76	2.4	2.4	1.12	?	1.52	2.4	2.32	2.12	2.06	1.72	1.15	1.19	2.4	2.16	2.34
MODERN	M8550	Taphozous georgianus	Barry Cave, Barkley highway, NT		F	24.25	12.86	10.63	21.32	10.32	4.92	11.11	11.11	11.11	4.76	15.24	12.06	10	?	6.67	8	18.57	18.89	18.73	12.38	12.38	12.38	5.87	6.03	5.95	7.16	5.92	2.52	1.72	2.6	2.4	1.16	1.48	1.44	2.54	2.56	2.08	2.34	1.72	1.13	1.2	2.38	2.3	2.34
MODERN	M8551	Taphozous georgianus	Native Bee Mine, Mt. Isa, QLD	Yes	F	22.37	11.75	9.21	19.76	9.21	4.6	10.16	10.32	10.24	4.29	13.81	10.79	8.89	9.05	6.67	7.11	18.25	18.25	18.25	11.27	11.75	11.51	5.87	5.71	5.79	6.76	5.4	2.3	1.66	2.38	2.36	1.04	1.44	1.34	2.34	2.32	1.98	1.92	1.71	1.08	1.05	2.36	2.08	2.24
MODERN	M8552	Taphozous georgianus	Native Bee Mine, Mt. Isa, QLD	Yes	M	22.85	12.06	8.73	19.36	8.57	4.76	10.32	10.32	10.32	5.08	14.13	11.27	8.73	9.68	7.14	7.29	18.25	17.46	17.855	11.43	11.11	11.27	6.03	5.71	5.87	6.96	5.28	2.12	1.76	2.46	2.22	0.98	1.46	1.3	2.42	2.42	1.98	2.06	1.67	0.97	0.91	2.22	2	2.16
MODERN	M9070	Taphozous georgianus	Riversleigh, QLD	Yes	F	21.22	11.27	8.89	20.02	8.57	4.29	9.84	9.84	9.84	4.76	13.65	11.11	8.41	8.57	6.35	7.5	17.46	17.46	17.46	11.43	11.11	11.27	5.4	5.71	5.555	6.64	5.24	2.24	1.7	2.44	2.32	0.96	1.32	1.4	2.46	2.34	1.98	2	1.61	1.1	1.04	2.32	2.06	2.28
MODERN	M9491	Taphozous georgianus	Pine Ck, NT	Yes	M	21.94	11.59	9.05	18.44	9.52	4.76	9.84	9.84	9.84	4.44	13.49	10.79	8.25	8.57	6.67	7.38	16.83	17.14	16.985	10.79	11.11	10.95	5.24	5.08	5.16	6.64	5.16	2.34	1.74	2.36	2.18	1.04	1.42	1.48	2.38	2.26	1.92	1.98	1.68	1.03	1.12	2.18	2.14	2.2
MODERN	M9878	Taphozous georgianus	Tit cave, Argyle Downs, WA	Yes	M	21.86	11.11	8.73	18.36	9.05	4.29	9.84	9.68	9.76	4.44	13.17	10.32	8.41	8.89	6.19	7.22	17.46	17.78	17.62	11.11	11.27	11.19	5.71	5.71	5.71	6.24	4.92	2.06	1.66	2.2	2.16	1.04	1.44	1.3	2.2	2.08	1.84	1.8	1.65	1	1.05	2.16	1.98	2.12
MODERN	M9879	Taphozous georgianus	Tit cave, Argyle Downs, WA	Yes	M	21	11.11	9.37	18.35	8.25	4.29	10	10.16	10.08	4.44	13.49	10.63	7.94	8.89	6.51	7.33	17.14	17.46	17.3	11.11	11.27	11.19	5.24	5.4	5.32	6.64	5.2	2.18	1.68	2.4	2.24	0.98	1.54	1.36	2.4	2.34	1.78	2.06	1.65	1.07	1.05	2.24	2.04	1.98
MODERN	M9881	Taphozous georgianus	Tit cave, Argyle Downs, WA	Yes	F	21.16	11.11	8.57	18.41	9.37	4.29	10	9.84	9.92	4.6	13.49	11.27	7.62	8.41	6.03	7.01	17.3	17.46	17.38	11.11	11.27	11.19	5.71	5.71	5.71	6.52	5.16	2.16	1.66	2.4	2.06	1.08	1.22	1.36	2.4	2.2	1.86	1.84	1.56	1.08	1.22	2.14	1.94	2.16
MODERN	M10352	Taphozous georgianus	50 km SSW Jabiru, NT	Yes	F	21.17	11.59	9.05	18.77	9.84	4.6	10.63	10.63	10.63	4.76	13.81	11.27	7.94	9.05	6.51	7.2	17.62	17.94	17.78	11.27	11.11	11.19	5.4	5.71	5.555	7.04	5.52	2.22	1.8	2.56	2.2	1.04	1.5	1.3	2.56	2.34	2.08	1.86	1.65	0.98	1.15	2.2	1.98	2.12
MODERN	M21429	Taphozous georgianus	Carlton Hill stat., Kununurm, WA		?	22.65	11.9	9.37	19.86	8.73	4.44	10.63	10.48	10.555	4.92	14.29	11.59	8.89	8.73	6.83	7.66	18.25	18.25	18.25	11.43	11.27	11.35	5.87	6.35	6.11	6.96	5.64	2.2	1.7	2.32	2.4	1.2	1.36	1.4	2.32	2.26	1.96	1.82	1.55	0.95	1.06	2.4	1.92	2.1
MODERN	M23451	Taphozous georgianus	Riversleigh, QLD	Yes	F	21.1	11.75	9.05	18.68	8.73	?	10.32	?	10.32	4.44	13.97	10.79	8.1	9.05	6.67	7.25	17.78	18.25	18.015	11.43	?	11.43	5.24	5.56	5.4	6.88	5.6	2.24	1.72	2.5	2.24	1.06	?	1.48	2.5	2.42	2	1.96	1.56	1.05	1.2	2.24	2.08	2.12
MODERN	M27892	Taphozous georgianus	Dempilli, Alligator River, NT		F	19.82	10.48	7.94	16.87	8.1	3.81	9.05	9.21	9.13	4.44	12.38	9.84	6.98	8.25	5.87	7.02	15.87	16.35	16.11	10.32	10.32	10.32	4.76	5.24	5	6	5	1.94	1.56	2.18	1.96	0.88	1.16	1.22	2.18	2.14	1.66	1.72	1.37	0.98	0.95	1.96	1.8	1.9
MODERN	M23452	Taphozous georgianus	Riversleigh, QLD	Yes	F	21.33	11.59	9.05	18.61	9.05	4.76	10.63	10.95	10.79	4.44	13.65	10.79	8.73	8.73	6.67	7.31	17.94	18.1	18.02	11.9	11.9	11.9	5.56	5.56	5.56	7	5.44	2.3	1.92	2.72	2.24	0.98	1.5	1.56	2.72	2.6	2	2.24	1.68	1.04	1.1	2.24	2.2	2.08
MODERN	M8201	Taphozous hilli	Ayers Rock, NT		F	20.31	11.27	7.94	17.11	10.16	3.81	9.05	9.05	9.05	5.56	13.65	11.43	6.98	8.73	6.51	7.44	16.67	16.51	16.59	10.32	10.16	10.24	5.24	5.08	5.16	6.04	4.96	1.9	1.62	2.22	2.08	0.9	0.96	1.7	2.22	2.12	2.22	1.86	1.27	0.97	1	2.08	1.92	2.28
MODERN	M4424	Taphozous australis	Possession Is, Torres St, QLD		M	21.69	11.9	9.21	18.91	10.79	4.29	10.16	10.16	10.16	4.92	14.29	11.75	7.3	9.21	6.51	7.69	18.1	18.1	18.1	11.27	11.27	11.27	6.03	6.03	6.03	6.68	5.24	2.34	1.78	2.32	2.08	0.96	1.22	1.46	2.32	2.26	2.16	1.98	1.35	0.92	0.95	2.08	2.1	2.2
MODERN	M4422	Taphozous australis	Possession Is, Torres St, QLD		M	22.05	12.06	9.05	19	11.27	4.29	9.84	10	9.92	5.24	14.44	11.75	7.3	8.89	6.19	7.73	17.78	17.94	17.86	11.11	11.11	11.11	6.35	6.19	6.27	6.36	5.16	2.3	1.66	2.22	2.08	1.02	1.14	1.4	2.22	2.14	2.1	1.92	1.38	0.98	1.02	2.08	2.04	2.2
MODERN	M4419	Taphozous australis	Possession Is, Torres St, QLD		M	22.5	12.22	9.68	19.17	11.43	4.44	10.32	10.16	10.24	5.24	14.29	11.9	7.94	9.05	6.51	7.89	18.25	18.41	18.33	11.43	11.43	11.43	6.19	6.19	6.19	6.6	5.32	2.46	1.78	2.34	2.22	1.08	1.22	1.38	2.34	2.38	2.14	2.22	1.41	0.96	1	2.22	2.1	2.28
MODERN	M4413	Taphozous australis	Possession Is, Torres St, QLD		F	21.92	11.9	9.37	18.59	11.11	3.95	9.5	9.7	9.6	5.2	13.81	11.9	7.78	9.05	6.83	7.61	17.14	16.83	16.985	10.3	10.3	10.3	5.4	5.46	5.43	6.48	5.28	2.46	1.72	2.3	2.2	1.08	1.22	1.52	2.28	2	2.04	1.66	1.23	1	1.1	2.2	1.92	2.2
MODERN	M4416	Taphozous australis	Possession Is, Torres St, QLD		M	22.08	11.9	8.57	18.87	10.63	4.76	10.32	10.16	10.24	5.24	15.08	11.11	7.94	8.73	6.35	7.28	17.46	17.46	17.46	11.27	10.95	11.11	5.42	5.27	5.345	6.48	5.16	2.28	1.82	2.06	2.2	1.06	1.24	1.56	2.04	2.04	2.16	2.02	1.34	0.99	1.08	2.2	1.88	2.22
MODERN	M2397	Taphozous australis	New Guinea		?	?	?	8.5	?	?	4.06	9.4	9.5	9.45	5.24	12.7	10.16	7.14	7.94	6.19	?	16.03	16	16.015	10.3	?	10.3	4.76	5.08	4.92	5.96	4.76	2.18	1.58	2.16	2.08	0.92	1.24	1.4	2.14	2.06	1.9	1.86	1.32	0.92	1	2.02	2.04	2.06
MODERN	M2398	Taphozous australis	New Guinea		?	?	11.43	9.68	15.39	10.72	4	8.4	8.4	8.4	4.7	12.48	11.2	7.2	8	4.4	8.03	?	?	#DIV/0!	10	10.5	10.25	5.2	5.04	5.12	6	4.72	2	1.4	2.2	1.98	0.9	1.1	1.26	2.18	1.88	1.92	1.84	1.33	1.02	0.96	2.02	1.92	2
MODERN	M4417	Taphozous australis	Possession Is, Torres St, QLD		M	21.09	12.06	9.21	18.95	11.27	7.62	9.68	10	9.84	5.24	13.97	11.59	7.78	8.89	6.83	7.8	17.62	17.62	17.62	11.27	11.11	11.19	5.42	5.54	5.48	6.32	5.12	2.28	1.74	2.26	2.14	1	1.22	1.44	2.26	2.24	1.96	1.98	1.46	0.99	1.1	2.14	2.14	2.2
MODERN	M4415	Taphozous australis	Possession Is, Torres St, QLD		M	22.04	12.06	9.21	18.97	10.48	4.29	?	?	?	5.08	14.13	11.59	7.78	8.73	6.67	7.65	?	?	#DIV/0!	?	?	?	?	?	?	6.56	5.2	2.24	1.74	2.2	2.12	1	1.18	1.46	2.2	2.16	2.14	1.98	1.41	1	1.05	2.12	2.12	2.24
MODERN	M3490	Saccolaimus saccolaimus	Kalutara, Ceylon		F	23.02	14.13	9.37	19.31	13.17	5.24	9.68	9.52	9.6	5.56	16.19	12.38	8.25	9.68	7.94	8.51	19.05	19.21	19.13	11.9	11.9	11.9	6.35	6.51	6.43	7.08	5.84	2.2	1.5	2.48	2.46	1.26	1.64	1.7	2.46	2.36	2.2	2.12	1.71	0.91	1.15	2.46	2.22	2.46
MODERN	M3491	Saccolaimus saccolaimus	Kalutara, Ceylon		M	?	13.97	10.79	?	12.7	4.92	9.52	9.68	9.6	6.35	15.08	13.49	9.68	9.68	7.78	7.69	18.73	19.05	18.89	11.59	11.43	11.51	6.19	6.35	6.27	6.72	5.56	2.2	1.44	2.52	2.42	1.06	1.54	1.52	2.52	2.34	2.28	2.1	1.8	1.08	1.21	2.44	2.22	2.44
MODERN	M3228	Saccolaimus flaviventris	Moree, NSW		F	?	?	11.11	?	?	6.98	12.38	12.38	12.38	6.35	?	?	11.9	11.43	10.32	?	22.86	?	22.86	?	14.13	14.13	7.3	?	7.3	8.32	6.68	2.4	2.04	3.2	2.9	1.2	2.12	2.1	3.16	2.48	2.32	2.24	2.15	1.3	1.1	2.88	2.88	3
MODERN	M8190	Saccolaimus flaviventris	Brewarrina, NSW		M	26.08	15.87	11.59	23.18	11.9	6.98	12.7	12.7	12.7	6.03	18.25	14.29	11.27	11.43	10.32	8.9	22.06	22.22	22.14	14.13	14.13	14.13	7.46	7.46	7.46	8.16	6.52	2.3	2.04	3.02	2.88	1.14	1.84	2.16	3.02	2.76	2.96	2.46	2.01	1.2	1.45	2.72	2.56	2.9
MODERN	M5057	Saccolaimus flaviventris	Groote Eylandt, NT		F	24.84	15.56	11.43	21.71	11.43	6.98	12.06	12.22	12.14	5.87	17.78	13.49	11.11	11.11	10	8.31	22.38	22.22	22.3	13.97	13.65	13.81	7.14	7.14	7.14	7.88	6.12	2.2	1.82	3.06	2.64	1.02	1.9	2.06	2.96	2.82	3.1	2.62	2.29	1.2	1.5	2.62	2.52	2.94
MODERN	M8583	Saccolaimus flaviventris	Smoke Hills, NT		F	25.01	14.92	10.16	21.86	12.06	6.98	12.06	12.22	12.14	5.71	16.67	13.49	10.32	10.95	9.84	8.93	22.06	21.75	21.905	14.13	14.13	14.13	7.62	7.46	7.54	7.84	6.28	2.5	2.06	3.02	2.68	1.12	1.9	2.04	2.94	2.76	2.68	2.48	2.02	1.24	1.55	2.68	2.54	2.6
MODERN	M21226	Saccolaimus flaviventris	Groote Eylandt, NT		F	25.66	13.65	12.06	22.8	11.9	6.83	12.7	12.54	12.62	5.87	16.51	13.17	10.32	11.11	9.37	8.2	22.06	21.59	21.825	?	14.44	14.44	?	6.67	6.67	8.08	6.6	2.7	1.68	3.26	2.88	1.16	2.26	2.1	3.18	3.1	3.1	2.94	2.17	1.35	1.39	2.74	2.88	3.08
MODERN	AMNH107736	Taphozous troughtoni	Quamby, QLD		F	24.3	13.14	10.3	21.45	?	5.26	11.51	11.55	11.53	5.35	15.75	12.65	10.13	10.75	7.86	8.3	21.3	21.64	21.47	12.95	12.95	12.95	7.96	8.03	7.995	7.56	6.02	2.585	1.86	2.86	2.3	1.165	1.585	1.475	2.895	2.705	2.21	2.145	1.8725	1.211	1.2755	2.465	2.195	2.4
MODERN	AMNH107751	Taphozous troughtoni	Quamby, QLD		M	24.2	13	10.33	21.3	9.69	?	11.17	?	11.17	4.74	15.17	11.91	9.99	10.11	7.42	8.45	20.6	20.66	20.63	12.38	?	12.38	7.32	7.44	7.38	7.265	5.68	2.6	1.85	2.56	2.49	1.225	1.43	1.575	2.5	2.465	2.03	2.16	1.6555	1.108	1.1325	2.56	2.22	2.29
MODERN	AMNH107740	Taphozous troughtoni	Quamby, QLD		M	23.7	12.76	10.02	20.6	10.09	?	11.1	?	11.1	4.74	15.25	11.98	9.52	9.64	7.27	8.3	19.48	19.29	19.385	?	?	?	?	?	?	7.185	5.485	2.46	1.945	2.39	2.32	1.145	1.48	1.57	2.4	2.39	2.095	?	?	?	1.115	2.24	2.24	2.36
MODERN	AMNH107761	Taphozous troughtoni	Quamby, QLD		F	24.1	12.38	10.35	20.75	?	?	11.13	?	11.13	4.52	14.99	12.26	9.85	9.42	7.08	8.05	19.08	19.32	19.2	?	?	?	?	?	?	7.59	5.83	2.7	1.88	2.61	2.5	1.2	1.41	1.64	2.64	2.43	2.22	1.95	1.6445	1.109	1.1865	2.42	2.17	2.525
MODERN	AMNH107749	Taphozous troughtoni	Quamby, QLD		M	23.4	12.55	10	20.4	9.66	?	?	?	?	4.84	15.46	12.13	9.73	10.75	7.46	8.05	19.44	19.6	19.52	?	12.13	12.13	6.58	6.4	6.49	7.04	5.69	?	1.785	2.535	2.31	1.14	?	1.435	2.435	2.545	1.98	2.17	1.6635	1.034	1.1275	2.385	2.28	2.01
MODERN	AMNH109263	Taphozous troughtoni	Quamby, QLD		F	24.15	?	9.9	20.7	?	4.79	11.36	11.3	11.33	4.81	14.91	12.22	9.54	10.28	7.18	8.1	21.02	?	21.02	13.14	?	13.14	6.85	?	6.85	7.475	6.005	2.54	1.885	2.7	2.645	1.13	1.375	1.51	2.69	2.615	2.275	2.21	1.7425	1.187	1.2195	2.585	2.39	2.52
MODERN	AMNH109269	Taphozous troughtoni	Pentland, QLD		M	23.6	12.65	9.71	21.1	9.8	5.12	?	11.11	11.11	4.48	16.05	12.19	9.42	10.39	7.49	8.3	?	20.57	20.57	?	12.45	12.45	?	7.6	7.6	7.265	5.84	2.64	1.905	2.655	2.52	1.215	1.47	1.565	2.55	2.575	2.1	2.155	1.7235	1.1105	1.2345	2.525	2.3	2.32
MODERN	AMNH109265	Taphozous troughtoni	Quamby, QLD		F	23.15	12.53	9.71	20.7	8.69	4.74	11.13	11.29	11.21	4.5	15.13	11.93	9.92	10.26	6.71	8	19.86	19.17	19.515	12.41	12.59	12.5	6.9	6.47	6.685	7.24	5.89	2.595	1.745	2.59	2.495	1.335	1.535	1.455	2.56	2.6	2.235	2.155	1.6685	1.176	1.252	2.555	2.335	2.4
MODERN	AMNH107750	Taphozous troughtoni	Quamby, QLD		M	24	12.67	9.87	20.75	9.8	4.79	10.85	10.99	10.92	4.65	15.43	12.24	9.8	10.35	7.44	7.9	21	21.05	21.025	12.81	?	12.81	8.1	7.98	8.04	7.13	5.695	2.365	1.86	2.6	2.46	1.11	1.405	1.525	2.535	2.555	2.285	2.135	1.7645	1.103	1.104	2.43	2.33	2.545
MODERN	AMNH162707	Taphozous troughtoni	Rifle Creek, Mt Isa, QLD		M	24.1	12.91	10.35	21.7	?	4.91	11.22	11.29	11.255	4.69	?	12.64	9.95	10.8	7.29	8	20.33	20.47	20.4	12.76	12.53	12.645	7.01	7.68	7.345	7.385	5.695	2.585	1.875	2.525	2.485	1.125	1.495	1.635	2.505	2.39	2.17	2.08	1.7415	1.07	1.228	2.45	2.24	2.315
MODERN	AMNH197182	Taphozous georgianus	Parry Creek, WA	Yes	M	21.5	11.15	9.09	19.2	8.78	4.48	9.88	10.25	10.065	4.22	13.12	10.84	8.19	9.12	6.23	7.35	17.78	18.06	17.92	11.3	10.92	11.11	6.32	6.56	6.44	6.78	5.31	2.13	1.69	2.405	2.2	1.1	1.465	1.36	2.385	2.355	1.925	1.725	1.528	0.937	1.0715	2.18	2.01	2.14
MODERN	AMNH183439	Taphozous georgianus	Red Bank Mine, NT	Yes	F	21.2	11.44	8.62	18.3	8.58	4.36	9.85	10.23	10.04	4.52	?	10.23	8.1	9.14	6.42	7.55	18.79	18.08	18.435	11.2	10.85	11.025	6.58	6.16	6.37	6.52	5.225	2.235	1.575	2.33	2.19	1.12	1.22	1.445	2.195	2.29	1.935	2.005	1.5595	0.99	0.9975	2.145	2.15	2.11
MODERN	AMNH109266	Taphozous georgianus	Quamby, QLD		M	22.35	12.67	8.86	18.85	9.68	4.71	10.89	11.23	11.06	4.52	14.63	11.17	8.81	9.81	7.56	7.8	19.56	19.32	19.44	12	12.05	12.025	7.01	6.56	6.785	7.16	5.78	2.63	1.67	2.635	2.39	0.98	1.61	1.49	2.63	2.55	1.755	2.09	1.748	0.9715	0.956	2.46	2.305	2.11
MODERN	AMNH183557	Taphozous georgianus	Chillagoe Caves, QLD		F	21.7	12.07	10.11	19.3	9.85	4.5	10.4	10.73	10.565	4.36	14.33	10.94	8.15	9.62	6.39	7.85	18.96	18.68	18.82	11.55	11.6	11.575	6.82	6.7	6.76	6.6	5.33	2.465	1.705	2.415	2.26	0.96	1.475	1.37	2.365	2.39	2.04	2.02	1.7065	0.95	1.0425	2.23	2.195	2.08
MODERN	AMNH107752	Taphozous georgianus	Quamby, QLD		F	21.1	11.37	8.93	18.5	9.17	4.39	10.44	10.49	10.465	3.91	13.57	10.26	8.98	9.66	5.97	7.1	18.68	17.87	18.275	?	?	?	6.63	?	6.63	6.745	5.37	2.165	1.735	2.44	?	1.07	1.495	1.42	2.385	2.485	1.75	2	1.596	0.9395	1.006	?	?	?
MODERN	AMNH183440	Taphozous georgianus	Red Bank Mine, NT	Yes	F	20.7	11.34	8.5	17.35	9.09	4.32	9.95	10.26	10.105	4.1	13.94	10.16	8.15	9.24	6.23	7.4	18.87	18.44	18.655	11.37	11.01	11.19	6.92	6.92	6.92	6.625	5.28	2.24	1.61	2.275	2.235	1.145	1.425	1.315	2.255	2.27	1.67	1.925	1.584	0.931	1.047	2.25	2.085	2.02
MODERN	AMNH197194	Taphozous georgianus	Pullcunah Hill, Woodstock, WA	Yes	M	21.9	11.7	8.84	18.6	9.29	4.65	10.26	10.52	10.39	4.19	14.09	10.84	8.71	10.02	6.66	7.6	18.27	18.51	18.39	11.1	11.29	11.195	6.63	6.73	6.68	6.73	5.12	2.095	1.77	2.21	2.365	1.02	1.485	1.625	2.33	2.16	2.02	1.9	1.693	0.8315	1.051	2.365	2.01	2.21
MODERN	AMNH183437	Taphozous georgianus	Red Bank Mine, NT	Yes	M	22.2	11.3	9.05	18.75	8.86	4.45	10.2	10.47	10.335	4.46	13.88	10.58	8.88	9.94	6.66	7.5	18.94	18.94	18.94	11.17	11.37	11.27	6.97	7.29	7.13	6.755	5.3	2.245	1.635	2.325	2.33	1.07	1.345	1.545	2.335	2.3	1.98	1.96	1.6845	1.0255	1.114	2.35	2.135	2.175
MODERN	AMNH107733	Taphozous georgianus	Quamby, QLD		F	22	?	9.16	?	?	4.46	9.75	10.4	10.075	3.96	?	10.18	9.17	9.92	6.18	?	18.37	18.44	18.405	11.36	11.46	11.41	6.19	6.33	6.26	6.52	5.365	2.25	1.755	2.535	2.295	1.045	1.475	1.495	2.325	2.515	2.05	2.165	1.6735	1.0325	1.075	1.74	2.29	2.255
MODERN	AMNH183438	Taphozous georgianus	Red Bank Mine, NT	Yes	F	22.2	11.6	8.67	18.65	8.69	5.05	10.47	10.66	10.565	4.45	14.27	10.87	8.45	10.11	6.71	7.6	19.2	18.84	19.02	11.67	11.67	11.67	6.99	7.03	7.01	6.765	5.44	2.285	1.725	2.55	2.39	1.04	1.675	1.535	2.46	2.49	1.895	2.06	1.8265	1.0715	1.1075	2.39	2.16	2.15
MODERN	AMNH160387	Taphozous georgianus	Katherine, NT	Yes	M	22.15	10.94	8.72	18.3	8.5	4.1	9.99	10.33	10.16	4.08	12.91	10.35	8.74	9.76	7.29	7.45	17.33	19.01	18.17	11.27	11.04	11.155	5.43	6.58	6.005	6.54	5.31	2.385	1.66	2.45	2.255	1.08	1.355	1.38	2.375	2.315	2.01	2.06	1.6775	0.9685	1.13	2.25	2.235	2.155
MODERN	AMNH107770	Taphozous georgianus	Pentland, QLD		F	22.3	11.68	8.24	18.9	11.75	4.34	10.56	10.82	10.69	4.68	13.5	10.97	8.19	9.57	6.51	7.9	18.23	18.39	18.31	11.55	11.46	11.505	6.65	6.68	6.665	6.805	5.71	2.455	1.67	2.525	2.325	0.99	1.35	1.51	2.55	2.37	2.1	1.995	1.7415	1.108	1.0315	2.23	2.065	2.225
MODERN	AMNH162706	Taphozous georgianus	Mt Etna, Rockhampton, QLD		M	22.4	12.34	8.93	18.95	8.78	4.45	10.56	10.68	10.62	4.52	14.35	11.11	8.81	10.11	6.89	8.25	18.65	19.11	18.88	11.56	11.96	11.76	6.37	6.77	6.57	6.975	5.505	2.355	1.72	2.475	2.345	1.05	1.45	1.455	2.52	2.315	1.98	1.995	1.7005	1.048	0.961	2.355	2.075	2.185
MODERN	AMNH107769	Taphozous georgianus	Pentland, QLD		M	22.45	12.27	8.48	19.65	9.14	4.53	10.3	10.58	10.44	4.81	14.65	10.91	8.48	10.39	6.99	7.95	19.34	18.94	19.14	11.58	10.92	11.25	6.97	6.87	6.92	6.85	5.455	2.37	1.61	2.465	2.33	1.065	1.48	1.465	2.465	2.35	1.91	1.9	1.6045	1.0025	1.0255	2.29	2.04	2.07
MODERN	AMNH107747	Taphozous georgianus	Quamby, QLD		F	21.8	11.56	8.78	18.9	9.02	4.38	10.28	10.58	10.43	4.64	?	10.49	9.26	9.29	6.52	7.6	18.39	?	18.39	?	?	?	5.8	5.71	5.755	6.72	5.295	2.345	1.795	2.565	2.205	0.99	1.4	1.62	2.56	2.5	2.015	2.11	1.715	1.056	1.109	2.3	2.065	2.17
MODERN	AMNH109267	Taphozous georgianus	Quamby, QLD		M	22.15	11.89	8.55	18.5	9.05	4.67	10.32	10.75	10.535	4.45	14.07	10.92	7.89	9.69	6.51	8.05	19.13	19.22	19.175	11.81	11.55	11.68	6.71	6.7	6.705	7.06	5.35	2.395	1.805	2.55	2.36	1.055	1.48	1.32	2.54	2.41	2.02	1.91	1.6435	1.0135	1.0245	2.365	2.12	2.01
MODERN	AMNH66145	Taphozous georgianus	Chillagoe Caves, QLD		M	22.2	11.88	9.21	19.75	9.36	4.43	10.18	10.32	10.25	4.52	14.27	11.39	8.52	9.8	7.23	8.05	19.46	19.37	19.415	11.74	11.82	11.78	6.99	6.84	6.915	6.755	5.41	2.355	1.705	2.49	2.235	0.96	1.41	1.51	2.405	2.435	2.1	2.045	1.671	1.022	1.104	2.31	2.145	2.2
MODERN	AMNH197199	Taphozous georgianus	Woodstock, WA	Yes	F	21.6	?	9.04	18.45	?	?	?	10.2	10.2	4.1	13.71	10.99	8.9	9.36	6.61	7.3	?	18.27	18.27	?	?	?	?	6.77	6.77	6.87	5.335	2.17	1.77	2.53	2.325	1.08	1.29	1.5	2.39	2.42	2.04	2.22	1.623	0.983	1.04	2.285	2.095	2.26
MODERN	AMNH197560	Taphozous georgianus	Tambrey, WA	Yes	M	21	11.22	8.6	18.6	8.67	4.32	9.71	10.02	9.865	4.43	13.49	10.75	8.38	9.5	6.71	7	18.25	18.51	18.38	11.2	11.25	11.225	6.68	6.73	6.705	6.385	5.07	2.21	1.725	2.385	2.15	0.935	1.465	1.46	2.325	2.35	1.91	1.96	1.545	1.035	1.052	2.17	2.05	2.09
MODERN	AMNH153516	Taphozous georgianus	QLD		?	21.85	11.08	9.33	18.4	8.79	4.19	10.23	10.44	10.335	4.48	13.68	11.48	8.93	9.57	6.82	7.7	18.92	18.73	18.825	11.79	11.67	11.73	6.52	6.59	6.555	6.735	5.445	2.26	1.6	2.525	2.205	1.055	1.34	1.525	2.39	2.475	2.005	2.095	1.5875	1.046	1.0705	2.21	2.205	2.17
MODERN	AMNH183552	Taphozous georgianus	Mungana Caves, QLD		M	21.7	11.56	8.27	19.2	9	4.39	10.3	10.37	10.335	4.64	13.68	11.42	8.81	9.38	6.75	7.8	18.47	18.75	18.61	11.39	11.63	11.51	6.23	6.59	6.41	6.9	5.47	2.505	1.79	2.41	2.32	1.06	1.445	1.535	2.385	2.405	2.045	2.055	1.5245	0.9795	1.073	2.29	2.145	2.105
MODERN	AMNH109264	Taphozous georgianus	Quamby, QLD		M	21.7	11.84	8.5	18.45	9.09	4.55	10.21	10.44	10.325	4.13	14.33	11.1	8.5	9.02	6.45	7.9	18.37	18.65	18.51	11.08	11.49	11.285	6.19	6.28	6.235	6.715	5.505	2.39	1.72	2.47	2.295	1.11	1.36	1.395	2.41	2.35	1.89	1.955	1.575	0.9745	1.15	2.25	2.11	2.11
MODERN	AMNH197183	Taphozous georgianus	Mundabullangana, Peawah, WA	Yes	F	21.3	10.3	9.07	18.8	8.71	4.48	9.92	10.16	10.04	4.32	13.64	10.94	8.41	9.64	6.47	7.55	18.44	18.46	18.45	11.17	11.17	11.17	6.73	6.9	6.815	6.58	5.095	2.02	1.635	2.335	2.195	1	1.405	1.435	2.315	2.15	1.85	1.785	1.5375	1.0325	1.1115	2.22	1.95	2.075
MODERN	AMNH197177	Taphozous georgianus	Black Elvire River, WA		?	21.7	11.63	8.46	18.55	9.38	4.2	9.81	9.95	9.88	3.94	13.71	10.3	8.45	9.55	6.28	7.5	18.92	?	18.92	11.08	11.08	11.08	6.59	?	6.59	6.485	5.185	2.055	1.65	2.38	2.115	1.015	1.365	1.465	2.295	2.385	1.98	1.96	1.71	1.0845	1.018	2.13	1.96	2.23
MODERN	AMNH197175	Taphozous georgianus	Mt Anderson, WA	Yes	F	21.25	11.29	8.88	19.3	8.65	4.31	10.13	10.32	10.225	4.53	13.21	10.21	8.01	9.5	6.45	7.15	?	18.66	18.66	10.85	11.1	10.975	?	6.61	6.61	6.58	5.27	2.17	1.695	2.51	2.16	1.03	1.495	1.56	2.48	2.27	1.78	1.82	1.488	0.9295	1.0045	2.16	1.9	2.15
MODERN	AMNH107731	Taphozous georgianus	Quamby, QLD		M	22.35	11.72	8.78	18.75	9.47	4.62	10.97	10.91	10.94	4.39	13.85	11.27	8.57	9.95	6.58	8.35	20.31	20.17	20.24	11.6	11.91	11.755	8.01	7.75	7.88	7.18	5.73	2.65	1.69	2.59	2.42	1.075	1.755	1.665	2.55	2.515	2.075	2.065	1.6565	1.0665	?	2.38	2.24	2.185
MODERN	AMNH197559	Taphozous georgianus	Inglis Gap, WA	Yes	M	21.95	11.3	9.36	19.05	8.74	4.53	10.2	10.44	10.32	4.34	13.81	10.25	7.87	9.36	7.16	7.5	18.75	18.72	18.735	11.15	11.46	11.305	6.56	6.44	6.5	6.825	5.35	2.275	1.78	2.475	2.24	1.005	1.45	1.41	2.47	2.4	1.845	1.955	1.609	1.097	1.046	2.35	2.065	2.07
MODERN	AMNH197200	Taphozous georgianus	6 mi. N.E. Yardie Homestead, WA	Yes	M	21.65	10.82	9.04	19.05	8.12	4.2	9.81	9.99	9.9	4.29	13.4	10.09	7.81	9.31	6.35	7.55	18.23	18.4	18.315	11.08	11.13	11.105	6.26	6.73	6.495	6.475	5.04	2.185	1.68	2.195	2.145	1.04	1.33	1.41	2.18	2.14	1.735	1.755	1.4185	0.893	0.945	2.16	2.005	1.995
MODERN	AMNH197176	Taphozous georgianus	Black Elvire River, WA	Yes	M	21.4	11.3	8.64	18.8	9.1	4.29	9.99	9.8	9.895	4.13	13.12	10.09	7.94	9.59	6.33	7.5	17.59	18.32	17.955	10.89	11.1	10.995	5.9	6.13	6.015	6.56	5.085	2.05	1.665	2.385	2.195	0.955	1.37	1.49	2.45	2.33	2.025	1.91	1.5525	1.0545	1.1125	2.17	1.92	2.19
MODERN	AMNH107753	Taphozous georgianus	Quamby, QLD		F	21.7	11.2	8.88	18.8	9.19	?	?	?	?	4.17	?	10.49	8.98	9.33	6.52	7.5	18.79	18.59	18.69	?	?	?	6.8	?	6.8	6.775	5.345	?	1.71	2.375	2.31	1.135	?	1.355	2.29	2.405	2.005	2.03	1.601	0.932	1.1405	2.32	2.16	2.27
MODERN	AMNH107748	Taphozous georgianus	Quamby, QLD		M	21.15	11.42	9.09	19.05	8.6	?	10.51	?	10.51	4.26	?	10.16	8.81	9.69	6.54	7.2	18.23	18.4	18.315	?	?	?	6.4	6.9	6.65	6.83	5.275	2.13	1.72	2.495	2.265	0.945	1.28	1.49	2.455	2.375	1.875	1.985	1.6845	1.1555	1.0485	2.26	2.05	2.03
MODERN	AMNH107754	Taphozous georgianus	Quamby, QLD		M	22.2	11.55	9.04	18.55	9.02	4.76	10.26	10.44	10.35	4.45	14.02	10.65	8.67	10.09	6.29	7.25	18.47	19.48	18.975	11.56	11.62	11.59	6.68	7.01	6.845	6.875	5.44	2.325	1.755	2.465	2.24	1.08	1.38	1.405	2.41	2.415	1.95	2.015	1.721	1.0665	1.245	2.22	2.01	2.245
MODERN	U3892	Taphozous hilli	Mt Samuel, WA		?	20.21	10.78	6.84	16.93	?	?	8.29	?	8.29	4.84	12.2	9.99	6.78	8.01	6.21	?	16.29	16.27	16.28	9.81	9.83	9.82	5.76	5.74	5.75	5.84	4.71	1.94	1.515	2.03	1.89	1	1.16	1.155	2.06	2.01	1.62	1.58	1.439	0.92	1.099	1.89	1.74	1.78
MODERN	U3910	Taphozous hilli	Coniston Stn, NT		?	19.98	11.41	7.15	17.28	9	3.61	9.12	9.24	9.18	5.59	13.49	11.11	6.61	9.31	6.54	7.6	16.38	16.43	16.405	10.07	10.23	10.15	5.47	5.52	5.495	5.905	4.87	2.12	1.36	2.095	2.03	1.01	1.06	1.28	2.1	2.105	1.755	1.76	1.478	0.9795	0.999	2.02	1.925	1.89
MODERN	U3889	Taphozous hilli	Tennant Ck, NT		?	20.14	10.99	6.92	17.09	8.36	3.34	8.52	8.86	8.69	5.31	13.26	10.77	6.89	9	6.59	7.45	16.43	16.52	16.475	10.07	9.95	10.01	5.55	5.64	5.595	5.905	4.82	1.91	1.4	2.155	2.12	1.035	1.025	1.365	2.105	2.135	1.745	1.78	1.5065	1.0475	0.888	2.135	1.885	1.95
MODERN	U3890	Taphozous hilli	Tennant Ck, NT		?	20.2	11.06	7.27	17.73	8.52	3.55	8.79	9.07	8.93	5.23	12.88	10.8	8.26	9.24	6.39	7.3	16.08	16.27	16.175	9.64	9.76	9.7	5.38	5.9	5.64	5.755	4.76	1.975	1.36	2.05	2.005	1.025	1.025	1.235	2.015	1.99	1.695	1.75	1.364	0.9925	0.96	2.01	1.835	1.805
MODERN	U3096	Taphozous hilli	?		?	19.82	11.34	6.89	17.33	8.83	3.74	9.02	9.28	9.15	5.52	13.43	11.22	6.82	8.65	6.54	7.7	16.43	16.24	16.335	10.13	9.99	10.06	5.52	5.8	5.66	5.78	4.775	2.075	1.425	2.115	2.03	0.975	1.05	1.405	2.07	2.12	1.67	1.785	1.5	0.9365	1.007	1.96	1.975	1.775
MODERN	U3902	Taphozous hilli	Hatches Ck Mine, NT		?	19.17	10.8	6.75	16.81	8.05	3.32	8.78	9.09	8.935	5.23	13.09	10.61	6.21	9.05	6.32	7.3	15.96	16.01	15.985	9.76	9.73	9.745	5.24	5.4	5.32	5.855	4.685	1.9	1.33	2.115	2.01	0.99	1.06	1.22	2.055	1.93	1.605	1.525	1.3715	0.9185	0.922	2.035	1.77	1.74
MODERN	U3828	Saccolaimus flaviventris	?		?	24.8	14.77	10.49	21.5	10.59	7.15	12.38	12.67	12.525	5.85	17.02	12.22	9.85	11.29	9.69	8.9	21.9	21.99	21.945	13.8	13.97	13.885	7.67	7.44	7.555	8.255	6.77	2.59	1.925	3.22	2.89	1.22	2.075	2.29	3.195	2.975	2.73	2.515	2.34	1.314	1.307	2.91	2.63	2.755
MODERN	U3831	Saccolaimus flaviventris	?		?	26.15	14.02	10.56	21.7	9.35	6.89	12.05	12.29	12.17	5.95	16.53	11.75	10.3	11.53	10.09	8.5	21.89	21.8	21.845	13.68	13.47	13.575	7.75	7.79	7.77	7.705	6.195	2.34	1.8	2.89	2.82	1.085	1.915	2.065	2.915	2.815	2.55	2.445	2.2185	1.1965	1.139	2.8	2.43	2.66
FOSSIL	AR21191				?	?	?	?	?	?	?	?	?	?	?	?	?	?	?	?	?	?	?	?	?	?	?	?	?	?	?	?	1.88	?	?	?	?	1.09	?	?	?	?	?	?	?	?	?	?	?
FOSSIL	AR21192				?	?	?	?	?	?	?	?	?	?	?	?	?	?	?	?	?	?	?	?	?	?	?	?	?	?	?	?	?	?	?	?	?	?	?	?	?	?	?	?	?	?	?	?	?
FOSSIL	AR21193				?	?	?	?	?	?	?	?	?	?	?	?	?	?	?	?	?	?	?	?	?	?	?	?	?	?	?	?	?	?	?	?	?	?	?	?	?	?	?	?	?	?	?	?	?
FOSSIL	AR21194				?	?	?	?	?	?	?	?	?	?	?	?	?	?	?	?	?	?	?	?	?	?	?	?	?	?	?	?	?	?	?	2.44	?	?	?	?	?	?	?	?	?	?	2.28	2.44	1.84
FOSSIL	AR21195				?	?	?	?	?	?	?	?	?	?	?	?	?	?	?	?	?	?	?	?	?	?	?	?	?	?	?	?	?	?	2.52	?	?	?	?	2.45	2.52	2.34	2.27	1.72	1.09	1.04	?	?	?
FOSSIL	AR21196				?	?	?	?	?	?	?	?	?	?	?	?	?	?	?	?	?	?	?	?	?	?	?	?	?	?	?	?	?	?	?	2.23	?	?	?	?	?	?	?	?	?	?	2.23	?	?
FOSSIL	AR21197				?	?	?	?	?	?	?	?	?	?	?	?	?	?	?	?	?	?	?	?	?	?	?	?	?	?	?	?	?	?	?	?	?	?	?	?	?	?	?	?	?	?	?	?	?
FOSSIL	AR21198				?	?	?	?	?	?	?	?	?	?	?	?	?	?	?	?	?	?	?	?	?	?	?	?	?	?	?	?	?	?	?	2.29	?	?	?	?	?	?	?	?	?	?	2.22	2.29	2.21
FOSSIL	AR21199				?	?	?	?	?	?	?	?	?	?	?	?	?	?	?	?	?	?	?	?	?	?	?	?	?	?	?	?	?	?	?	2.58	?	?	?	?	?	?	?	?	?	?	2.58	?	?
FOSSIL	AR21200				?	?	?	?	?	?	?	?	?	?	?	?	?	?	?	?	?	?	?	?	?	?	?	?	?	?	?	?	?	?	?	?	?	?	?	?	?	?	?	?	?	?	?	?	?
FOSSIL	AR21201				?	?	?	?	?	?	?	?	?	?	?	?	?	?	?	?	?	?	?	?	?	?	?	?	?	?	?	?	?	?	?	2.48	?	?	?	?	?	?	?	?	?	?	2.33	2.48	2.38
FOSSIL	AR21202				?	?	?	?	?	?	?	?	?	?	?	?	?	?	?	?	?	?	?	?	?	?	?	?	?	?	?	?	1.7	?	?	?	?	0.98	?	?	?	?	?	?	?	?	?	?	?
FOSSIL	AR21203				?	?	?	?	?	?	?	?	?	?	?	?	?	?	?	?	?	?	?	?	?	?	?	?	?	?	?	?	?	?	?	?	?	?	?	?	?	?	?	?	?	?	?	?	?
FOSSIL	AR21204				?	?	?	?	?	?	?	?	?	?	?	?	?	?	?	?	?	?	?	?	?	?	?	?	?	?	?	?	2.04	?	?	?	?	1.3	?	?	?	?	?	?	?	?	?	?	?
FOSSIL	AR21205				?	?	?	?	?	?	?	?	?	?	?	?	?	?	?	?	?	?	?	?	?	?	?	?	?	?	?	?	2.08	?	?	?	?	1.3	?	?	?	?	?	?	?	?	?	?	?
FOSSIL	AR21206				?	?	?	?	?	?	?	?	?	?	?	?	?	?	?	?	?	?	?	?	?	?	?	?	?	?	?	?	?	?	?	2.67	?	?	?	?	?	?	?	?	?	?	2.22	2.67	2.36
FOSSIL	AR21207				?	?	?	?	?	?	?	?	?	?	?	?	?	?	?	?	?	?	?	?	?	?	?	?	?	?	?	?	2.03	?	?	?	?	1.11	?	?	?	?	?	?	?	?	?	?	?
FOSSIL	AR21208				?	?	?	?	?	?	?	?	?	?	?	?	?	?	?	?	?	?	?	?	?	?	?	?	?	?	?	?	?	?	?	?	?	?	?	?	?	?	?	?	?	?	?	?	?
FOSSIL	AR21209				?	?	?	?	?	?	?	?	?	?	?	?	?	?	?	?	?	?	?	?	?	?	?	?	?	?	?	?	?	?	2.66	?	?	?	?	2.56	2.66	1.85	2.25	1.59	1.01	0.93	?	?	?
FOSSIL	AR21210				?	?	?	?	?	?	?	?	?	?	?	?	?	?	?	?	?	?	?	?	?	?	?	?	?	?	?	?	?	?	?	?	?	?	?	?	?	?	?	?	?	?	?	?	?
FOSSIL	AR21211				?	?	?	?	?	?	?	?	?	?	?	?	?	?	?	?	?	?	?	?	?	?	?	?	?	?	?	?	?	?	?	?	?	?	?	?	?	?	?	?	?	?	?	?	?
FOSSIL	AR21213				?	?	?	?	?	?	?	?	?	?	?	?	?	?	?	?	?	?	?	?	?	?	?	?	?	?	?	?	2.06	?	?	?	?	1.06	?	?	?	?	?	?	?	?	?	?	?
FOSSIL	AR21215				?	?	?	?	?	?	?	?	?	?	?	?	?	?	?	?	?	?	?	?	?	?	?	?	?	?	?	?	2.23	?	?	?	?	1.18	?	?	?	?	?	?	?	?	?	?	?
FOSSIL	AR21216				?	?	?	?	?	?	?	?	?	?	?	?	?	?	?	?	?	?	?	?	?	?	?	?	?	?	?	?	?	?	?	?	?	?	?	?	?	?	?	?	?	?	?	?	?
FOSSIL	AR21218				?	?	?	?	?	?	?	?	?	?	?	?	?	?	?	?	?	?	?	?	?	?	?	?	?	?	?	?	1.99	?	?	?	?	1.15	?	?	?	?	?	?	?	?	?	?	?
FOSSIL	AR21219				?	?	?	?	?	?	?	?	?	?	?	?	?	?	?	?	?	?	?	?	?	?	?	?	?	?	?	?	?	?	?	?	?	?	?	?	?	?	?	?	?	?	?	?	?
FOSSIL	AR21220				?	?	?	?	?	?	?	?	?	?	?	?	?	?	?	?	?	?	?	?	?	?	?	?	?	?	?	?	?	?	?	?	?	?	?	?	?	?	?	?	?	?	?	?	?
FOSSIL	AR21221				?	?	?	?	?	?	?	?	?	?	?	?	?	?	?	?	?	?	?	?	?	?	?	?	?	?	?	?	?	?	?	2.62	?	?	?	?	?	?	?	?	?	?	2.1	2.62	2.05
FOSSIL	AR21222				?	?	?	?	?	?	?	?	?	?	?	?	?	?	?	?	?	?	?	?	?	?	?	?	?	?	?	?	2.16	?	?	?	?	1.01	?	?	?	?	?	?	?	?	?	?	?
FOSSIL	AR21223				?	?	?	?	?	?	?	?	?	?	?	?	?	?	?	?	?	?	?	?	?	?	?	?	?	?	?	?	?	?	?	2.41	?	?	?	?	?	?	?	?	?	?	2.41	?	?
FOSSIL	AR21224				?	?	?	?	?	?	?	?	?	?	?	?	?	?	?	?	?	?	?	?	?	?	?	?	?	?	?	?	?	?	?	2.4	?	?	?	?	?	?	?	?	?	?	2.33	2.4	2.34
FOSSIL	AR21225				?	?	?	?	?	?	?	?	?	?	?	?	?	?	?	?	?	?	?	?	?	?	?	?	?	?	?	?	?	?	?	?	?	?	?	?	?	?	?	?	?	?	?	?	?
FOSSIL	AR21226				?	?	?	?	?	?	?	?	?	?	?	?	?	?	?	?	?	?	?	?	?	?	?	?	?	?	?	?	?	?	?	?	?	?	?	?	?	?	?	?	?	?	?	?	?
FOSSIL	AR21227				?	?	?	?	?	?	?	?	?	?	?	?	?	?	?	?	?	?	?	?	?	?	?	?	?	?	?	?	2.15	?	?	?	?	1.14	?	?	?	?	?	?	?	?	?	?	?
FOSSIL	AR21229				?	?	?	?	?	?	?	?	?	?	?	?	?	?	?	?	?	?	?	?	?	?	?	?	?	?	?	?	?	1.92	2.8	?	?	?	1.66	2.49	2.8	2.29	2.19	1.71	1.18	1.05	?	?	?
FOSSIL	AR21230				?	?	?	?	?	?	?	?	?	?	?	?	?	?	?	?	?	?	?	?	?	?	?	?	?	?	?	?	?	?	?	2.54	?	?	?	?	?	?	?	?	?	?	2.15	2.54	2.18
FOSSIL	AR21231				?	?	?	?	?	?	?	?	?	?	?	?	?	?	?	?	?	?	?	?	?	?	?	?	?	?	?	?	?	?	2.72	?	?	?	?	2.52	2.72	2.16	2.11	1.53	1.1	1.06	?	?	?
FOSSIL	AR21232				?	?	?	?	?	?	?	?	?	?	?	?	?	?	?	?	?	?	?	?	?	?	?	?	?	?	?	?	?	?	?	?	?	?	?	?	?	?	?	?	?	?	?	?	?
FOSSIL	AR21234				?	?	?	?	?	?	?	?	?	?	?	?	?	?	?	?	?	?	?	?	?	?	?	?	?	?	?	?	?	?	?	2.7	?	?	?	?	?	?	?	?	?	?	2.2	2.7	2.19
FOSSIL	AR21235				?	?	?	?	?	?	?	?	?	?	?	?	?	?	?	?	?	?	?	?	?	?	?	?	?	?	?	?	?	?	2.73	?	?	?	?	2.44	2.73	2.05	2.39	1.68	1.03	1.28	?	?	?
FOSSIL	AR21236				?	?	?	?	?	?	?	?	?	?	?	?	?	?	?	?	?	?	?	?	?	?	?	?	?	?	?	?	?	?	?	?	?	?	?	?	?	?	?	?	?	?	?	?	?
FOSSIL	AR21237				?	?	?	?	?	?	?	?	?	?	?	?	?	?	?	?	?	?	?	?	?	?	?	?	?	?	?	?	?	?	?	?	?	?	?	?	?	?	?	?	?	?	?	?	?
FOSSIL	AR21238				?	?	?	?	?	?	?	?	?	?	?	?	?	?	?	?	?	?	?	?	?	?	?	?	?	?	?	?	?	?	?	2.13	?	?	?	?	?	?	?	?	?	?	2.13	?	?
FOSSIL	AR21239				?	?	?	?	?	?	?	?	?	?	?	?	?	?	?	?	?	?	?	?	?	?	?	?	?	?	?	?	2.07	?	?	?	?	1.1	?	?	?	?	?	?	?	?	?	?	?
FOSSIL	AR21240				?	?	?	?	?	?	?	?	?	?	?	?	?	?	?	?	?	?	?	?	?	?	?	?	?	?	?	?	1.91	?	?	?	?	1.31	?	?	?	?	?	?	?	?	?	?	?
FOSSIL	AR21242				?	?	?	?	?	?	?	?	?	?	?	?	?	?	?	?	?	?	?	?	?	?	?	?	?	?	?	?	?	?	2.54	?	?	?	?	2.54	2.44	2.05	1.81	1.54	1.08	1.01	?	?	?
FOSSIL	AR21243				?	?	?	?	?	?	?	?	?	?	?	?	?	?	?	?	?	?	?	?	?	?	?	?	?	?	?	?	?	?	?	?	?	?	?	?	?	?	?	?	?	?	?	?	?
FOSSIL	QMF23628				?	?	?	?	?	?	?	?	?	?	?	?	?	?	?	?	?	?	?	?	?	?	?	?	?	?	?	?	?	?	?	?	?	?	?	?	?	?	?	?	?	?	?	?	?
FOSSIL	QMF23840				?	?	?	?	?	?	?	?	?	?	?	?	?	?	?	?	?	?	?	?	?	?	?	?	?	?	?	?	?	?	2.59	?	?	?	?	2.5	2.59	2.21	2.13	1.65	1.12	1.06	?	?	?
FOSSIL	QMF23842				?	?	?	?	?	?	?	?	?	?	?	?	?	?	?	?	?	?	?	?	?	?	?	?	?	?	?	?	?	?	?	?	?	?	?	?	?	?	?	?	?	?	?	?	?
FOSSIL	QMF23843				?	?	?	?	?	?	?	?	?	?	?	?	?	?	?	?	?	?	?	?	?	?	?	?	?	?	?	?	2.22	?	?	?	?	1.27	?	?	?	?	?	?	?	?	?	?	?
FOSSIL	QMF23844				?	?	?	?	?	?	?	?	?	?	?	?	?	?	?	?	?	?	?	?	?	?	?	?	?	?	?	?	?	?	2.63	?	?	?	?	2.56	2.63	2.19	2.16	1.64	1.25	1.01	?	?	?
FOSSIL	QMF23845				?	?	?	?	?	?	?	?	?	?	?	?	?	?	?	?	?	?	?	?	?	?	?	?	?	?	?	?	?	2.23	?	?	?	?	1.51	?	?	?	?	?	?	?	?	?	?
FOSSIL	QMF23846				?	?	?	?	?	?	?	?	?	?	?	?	?	?	?	?	?	?	?	?	?	?	?	?	?	?	?	?	?	?	?	3	?	?	?	?	?	?	?	?	?	?	?	3	2.79
FOSSIL	QMF23847				?	?	?	?	?	?	?	?	?	?	?	?	?	?	?	?	?	?	?	?	?	?	?	?	?	?	?	?	?	?	?	?	?	?	?	?	?	?	?	?	?	?	?	?	?
FOSSIL	QMF23848				?	?	?	?	?	?	?	?	?	?	?	?	?	?	?	?	?	?	?	?	?	?	?	?	?	?	?	?	?	?	2.39	?	?	?	?	2.39	2.38	1.69	1.97	1.55	1.03	0.78	?	?	?
FOSSIL	QMF23849				?	?	?	?	?	?	?	?	?	?	?	?	?	?	?	?	?	?	?	?	?	?	?	?	?	?	?	?	?	?	2.19	?	?	?	?	2.19	2.2	1.82	1.73	?	0.99	1.07	?	?	?
FOSSIL	QMF23853				?	?	?	?	?	?	?	?	?	?	?	?	?	?	?	?	?	?	?	?	?	?	?	?	?	?	?	?	?	?	?	?	?	?	?	?	?	?	?	?	?	?	?	?	?
FOSSIL	QMF23854				?	?	?	?	?	?	?	?	?	?	?	?	?	?	?	?	?	?	?	?	?	?	?	?	?	?	?	?	?	?	2.56	?	?	?	?	2.11	2.56	2.16	2.32	1.61	1.03	1.14	?	?	?
FOSSIL	QMF23857				?	?	?	?	?	?	?	?	?	?	?	?	?	?	?	?	?	?	?	?	?	?	?	?	?	?	?	?	?	?	?	?	?	?	?	?	?	?	?	?	?	?	?	?	?
FOSSIL	QMF23865/AR10827				?	?	?	?	?	?	?	?	?	?	?	?	?	?	?	?	?	?	?	?	?	?	?	?	?	?	?	?	?	?	2.72	?	?	?	?	2.58	2.72	1.99	2.22	1.64	1.14	1.03	?	?	?
FOSSIL	QMF23866				?	?	?	?	?	?	?	?	?	?	?	?	?	?	?	?	?	?	?	?	?	?	?	?	?	?	?	?	?	?	?	?	?	?	?	?	?	?	?	?	?	?	?	?	?
FOSSIL	QMF23867				?	?	?	?	?	?	?	?	?	?	?	?	?	?	?	?	?	?	?	?	?	?	?	?	?	?	?	?	?	?	?	?	?	?	?	?	?	?	?	?	?	?	?	?	?
FOSSIL	QMF23868				?	?	?	?	?	?	?	?	?	?	?	?	?	?	?	?	?	?	?	?	?	?	?	?	?	?	?	?	?	2.16	?	?	?	?	1.56	?	?	?	?	?	?	?	?	?	?
[truncated: 34 more columns]
